# Supplementary material for: Melatonin and Multivitamin Use in Sleep Disturbance Populations: Associations with Health Outcomes and Mortality from a National Cohort Study
Source: Research Square preprint supplement (doi:10.21203/rs.3.rs-6213720/v1), 2025-05-14
Supplement: Supplementary file 1 [file 783c27cd6878123da819e5e1.docx]

**[Supplementary Materials](D:/u%E7%9B%98/%E6%9C%89%E9%81%93/10.0.9.0/resultui/html/index.html" \l "/javascript:;)**

**[Supplementary Tables](D:/u%E7%9B%98/%E6%9C%89%E9%81%93/10.0.9.0/resultui/html/index.html" \l "/javascript:;)**

**Table S1.** The main type of vitamin in dietary supplements.

**Table S2.** Characteristics of the study population with various groups.

**Table S3.** Differences in sleep duration between the groups.

**Table S4.** Differences in PHQ score between the groups.

**Table S5.** Logistic regression analyses of the associations between specified vitamins, sleep duration, and depressive symptoms.

**Table S6.** Multivariate Cox regression analysis examining the impact of dietary supplements on all-cause mortality in participants who took any dietary supplement containing the specified vitamins.

**Table S7.** Multivariate Cox regression analysis examining the impact of dietary supplements on cardiovascular mortality in participants who took any dietary supplement containing the specified vitamins.

**Table S8.** Logistic regression analyses of the associations between dietary supplements, sleep duration, and depressive symptoms in sensitivity analysis.

**Table S9.** Multivariate Cox regression analysis examining the impact of dietary supplements in sensitivity analysis.

**Table S1.** The main type of vitamin in dietary supplements.

| **Vitamin** | **Main component** |
| --- | --- |
| Vitamin A | Vitamin A; Beta-Carotenea |
| Thiamin | Thiamin |
| Riboflavin | Riboflavin |
| Niacin | Niacin; Inositol Hexaniacinate |
| Pantothenic Acid | Pantothenic Acid |
| Vitamin B-6 | Vitamin B-6 |
| Folate | Metafolin (L-Methylfolate); L-Methylfolate Calcium |
| Vitamin B-12 | Vitamin B-12 |
| Choline | Choline; Choline Bitartrate; Phosphatidylcholine |
| Vitamin C | Vitamin C |
| Vitamin D | Vitamin D |
| Vitamin E | Vitamin E |
| Vitamin K | Vitamin K |
| Biotin | Biotin |

a In most dietary supplements, beta-carotene is always present in the same dietary supplement as vitamin A, so it was not considered for subsequent analysis.

**Table S2.** Characteristics of the study population with various groups.

| **Variables** | **With melatonin only**  **(*n*=2651)** | **With MVM only**  **(*n*=72)** | **Statistics**  ***p*** |
| --- | --- | --- | --- |
| Age (years) | 56.0 (43.0 - 67.0) | 52.5 (38.5 - 63.2) | 0.226 |
| Gender, Male, n (%) | 1027 (38.7%) | 27 (37.5%) | 0.831 |
| BMI (kg/m2) | 28.6 (24.8 - 33.6) | 30.4 (26.6 - 33.5) | 0.143 |
| Calorie intake (kcal) | 1876.5 (1433.0 - 2408.5) | 1836.8 (1477.4 - 2413.6) | 0.977 |
| Education, n (%) |  |  | **0.045** |
| Less Than 9th Grade | 144 (5.4%) | 1 (1.4%) |  |
| 9-11th Grade | 241 (9.1%) | 3 (4.2%) |  |
| High School Grad/GED | 567 (21.4%) | 19 (26.4%) |  |
| Some College or AA degree | 920 (34.7%) | 34 (47.2%) |  |
| College Graduate or above | 779 (29.4%) | 15 (20.8%) |  |
| Marry status, n (%) |  |  | 0.261 |
| Marry/Living with partner | 1574 (59.4%) | 38 (52.8%) |  |
| Widowed/Divorced/Separated/Never married | 1077 (40.6%) | 34 (47.2%) |  |
| Race, n (%) |  |  | 0.109 |
| Non-Hispanic White | 247 (9.3%) | 2 (2.8%) |  |
| Non-Hispanic Black | 173 (6.5%) | 4 (5.6%) |  |
| Mexican American | 1597 (60.2%) | 54 (75.0%) |  |
| Other Hispanic | 442 (16.7%) | 9 (12.5%) |  |
| Other Race/multiracial | 192 (7.2%) | 3 (4.2%) |  |
| PIR | 2.8 (1.3 - 5.0) | 2.2 (1.3 - 4.2) | 0.186 |
| Drinking status, n (%) |  |  | 0.123 |
| Yes | 2041 (77.0%) | 61 (84.7%) |  |
| No | 610 (23.0%) | 11 (15.3%) |  |
| Smoking status, n (%) |  |  | 0.220 |
| Never smoker | 1338 (50.5%) | 30 (41.7%) |  |
| Former smoker | 865 (32.6%) | 25 (34.7%) |  |
| Current smoker | 448 (16.9%) | 17 (23.6%) |  |
| Depressive symptoms, n (%) |  |  | 0.205 |
| None | 1593 (60.1%) | 38 (52.8%) |  |
| Mild | 635 (24.0%) | 17 (23.6%) |  |
| Moderate to severe | 423 (16.0%) | 17 (23.6%) |  |
| Physical activity, n (%) |  |  | 0.114 |
| Inactive | 1527 (57.6%) | 50 (69.4%) |  |
| Insufficiently active | 380 (14.3%) | 6 (8.3%) |  |
| Sufficiently active | 744 (28.1%) | 16 (22.2%) |  |
| CVD history, n (%) |  |  | 0.567 |
| Yes | 143 (5.4%) | 5 (6.9%) |  |
| No | 2508 (94.6%) | 67 (93.1%) |  |
| Stroke history, n (%) |  |  | 0.295 |
| Yes | 145 (5.5%) | 6 (8.3%) |  |
| No | 2506 (94.5%) | 66 (91.7%) |  |
| Diabetes mellitus, n (%) |  |  | **0.022** |
| Yes | 431 (16.3%) | 19 (26.4%) |  |
| No | 2220 (83.7%) | 53 (73.6%) |  |

Continuous variables are expressed as Median with Interquartile Range (IQR). The categorical variables were presented as numbers and percentages. Abbreviations: MVM, multivitamin-mineral supplements; BMI, body mass index; PIR, family poverty income ratio; CVD, cardiovascular disease. Bold p-values denote statistical significance at the p < 0.05 level.

**Table S3.** Differences in sleep duration between the groups.

| **Dietary supplement names** | **Num** | **Dietary supplement group** | | **Without dietary supplement** | | **Statistics** | |
| --- | --- | --- | --- | --- | --- | --- | --- |
| **Mean** | **SD** | **Mean** | **SD** | **t** | ***P*-value** |
| Melatonin only | 72 | 7.09 | 1.68 | 6.55 | 1.85 | 2.68 | **<0.001** |
| MVM only | 2651 | 6.80 | 1.55 | 6.55 | 1.85 | 5.44 | **<0.001** |
| Vitamin Aa | 2591 | 6.79 | 1.55 | 6.55 | 1.85 | 5.08 | **<0.001** |
| Thiamina | 2540 | 6.80 | 1.55 | 6.55 | 1.85 | 5.30 | **<0.001** |
| Riboflavina | 2544 | 6.80 | 1.55 | 6.55 | 1.85 | 5.19 | **<0.001** |
| Niacina | 2666 | 6.81 | 1.55 | 6.55 | 1.85 | 5.48 | **<0.001** |
| Pantothenic Acida | 2522 | 6.80 | 1.55 | 6.55 | 1.85 | 5.35 | **<0.001** |
| Vitamin B-6a | 2783 | 6.82 | 1.55 | 6.55 | 1.85 | 5.86 | **<0.001** |
| Metafolin (L-Methylfolate)a | 8 | 7.38 | 1.71 | 6.55 | 1.85 | 1.36 | 0.214 |
| Vitamin B-12a | 2988 | 6.83 | 1.58 | 6.55 | 1.85 | 6.00 | **<0.001** |
| Cholinea | 351 | 6.83 | 1.44 | 6.55 | 1.85 | 3.28 | **0.001** |
| Vitamin Ca | 3031 | 6.82 | 1.57 | 6.55 | 1.85 | 5.93 | **<0.001** |
| Vitamin Da | 3384 | 6.86 | 1.60 | 6.55 | 1.85 | 6.83 | **<0.001** |
| Vitamin Ea | 2786 | 6.80 | 1.55 | 6.55 | 1.85 | 5.36 | **<0.001** |
| Vitamin Ka | 1854 | 6.80 | 1.54 | 6.55 | 1.85 | 4.92 | **<0.001** |
| Biotina | 2441 | 6.83 | 1.54 | 6.55 | 1.85 | 5.86 | **<0.001** |
| Choline Bitartratea | 86 | 6.74 | 1.48 | 6.55 | 1.85 | 1.19 | 0.239 |
| Phosphatidylcholinea | 10 | 6.70 | 1.16 | 6.55 | 1.85 | 0.41 | 0.694 |
| Inositol Hexaniacinatea | 3 | - | - | - | - | - | - |
| L-Methylfolate Calciuma | 3 | - | - | - | - | - | - |

a Participants took any dietary supplement containing the specified vitamins.

Statistical analysis was performed using independent t-test. Bold p-values denote statistical significance at the p < 0.05 level.

**Table S4.** Differences in PHQ scores between the groups.

| **Dietary supplement names** | **Num** | **Dietary supplement group** | | **Without dietary supplement** | | **Statistics** | |
| --- | --- | --- | --- | --- | --- | --- | --- |
| **Mean** | **SD** | **Mean** | **SD** | **t** | ***P*-value** |
| Melatonin only | 72 | 5.96 | 5.47 | 5.95 | 5.60 | 0.015 | 0.988 |
| MVM only | 2651 | 4.93 | 5.02 | 5.95 | 5.60 | -7.00 | **<0.001** |
| Vitamin Aa | 2591 | 4.90 | 4.97 | 5.95 | 5.60 | -7.22 | **<0.001** |
| Thiamina | 2540 | 4.93 | 4.99 | 5.95 | 5.60 | -6.99 | **<0.001** |
| Riboflavina | 2544 | 4.93 | 5.01 | 5.95 | 5.60 | -6.92 | **<0.001** |
| Niacina | 2666 | 4.91 | 5.01 | 5.95 | 5.60 | -7.17 | **<0.001** |
| Pantothenic Acida | 2522 | 4.86 | 4.94 | 5.95 | 5.60 | -7.47 | **<0.001** |
| Vitamin B-6a | 2783 | 4.96 | 5.03 | 5.95 | 5.60 | -6.84 | **<0.001** |
| Metafolin (L-Methylfolate)a | 8 | 7.50 | 8.18 | 5.95 | 5.60 | 0.54 | 0.608 |
| Vitamin B-12a | 2988 | 5.03 | 5.05 | 5.95 | 5.60 | -6.45 | **<0.001** |
| Cholinea | 351 | 4.96 | 5.00 | 5.95 | 5.60 | -3.42 | **0.001** |
| Vitamin Ca | 3031 | 4.93 | 5.04 | 5.95 | 5.60 | -7.21 | **<0.001** |
| Vitamin Da | 3384 | 4.98 | 5.04 | 5.95 | 5.60 | -7.04 | **<0.001** |
| Vitamin Ea | 2786 | 4.88 | 4.98 | 5.95 | 5.60 | -7.44 | **<0.001** |
| Vitamin Ka | 1854 | 4.70 | 4.88 | 5.95 | 5.60 | -7.99 | **<0.001** |
| Biotina | 2441 | 4.79 | 4.92 | 5.95 | 5.60 | -7.91 | **<0.001** |
| Choline Bitartratea | 86 | 5.63 | 5.49 | 5.95 | 5.60 | -0.53 | 0.596 |
| Phosphatidylcholinea | 10 | 4.10 | 2.38 | 5.95 | 5.60 | -2.43 | **0.037** |
| Inositol Hexaniacinatea | 3 | - | - | - | - | - | - |
| L-Methylfolate Calciuma | 3 | - | - | - | - | - | - |

a Participants took any dietary supplement containing the specified vitamins.

Statistical analysis was performed using independent t-test. Bold p-values denote statistical significance at the p < 0.05 level.

Abbreviation: SD, Standard deviation; MVM, multivitamin mineral supplements.

**Table S5.** Logistic regression analyses of the associations between specified vitamins, sleep duration, and depressive symptoms.

| **Vitamins**a | **Num** | **Short sleep** | | **Long sleep** | | **Depressive symptoms** | |
| --- | --- | --- | --- | --- | --- | --- | --- |
| **OR (95% CI)** | ***P*-value** | **OR (95% CI)** | ***P*-value** | **OR (95% CI)** | ***P*-value** |
| Vitamin A | 2591 | 0.79 (0.69 - 0.92) | **0.002** | 0.95 (0.79 - 1.13) | 0.559 | 1.05 (0.90 - 1.23) | 0.524 |
| Thiamin | 2540 | 0.79 (0.69 - 0.92) | **0.002** | 0.94 (0.79 - 1.13) | 0.506 | 1.07 (0.91 - 1.26) | 0.396 |
| Riboflavin | 2544 | 0.80 (0.69 - 0.92) | **0.002** | 0.94 (0.79 - 1.13) | 0.529 | 1.08 (0.92 - 1.26) | 0.370 |
| Niacin | 2666 | 0.79 (0.69 - 0.92) | **0.002** | 0.96 (0.80 - 1.14) | 0.647 | 1.07 (0.92 - 1.26) | 0.372 |
| Pantothenic Acid | 2522 | 0.79 (0.68 - 0.91) | **0.001** | 0.96 (0.80 - 1.15) | 0.661 | 1.07 (0.91 - 1.26) | 0.404 |
| Vitamin B-6 | 2783 | 0.79 (0.68 - 0.91) | **0.001** | 0.99 (0.83 - 1.18) | 0.905 | 1.09 (0.94 - 1.28) | 0.256 |
| Metafolin (L-Methylfolate) | 8 | - | - | - | - | - | - |
| Vitamin B-12 | 2988 | 0.77 (0.67 - 0.89) | **<0.001** | 1.01 (0.86 - 1.20) | 0.865 | 1.12 (0.96 - 1.30) | 0.147 |
| Choline | 351 | 0.70 (0.51 - 0.96) | **0.029** | 1.16 (0.81 - 1.64) | 0.402 | 1.10 (0.78 - 1.54) | 0.565 |
| Vitamin C | 3031 | 0.79 (0.68 - 0.90) | **0.001** | 1.02 (0.86 - 1.20) | 0.847 | 1.08 (0.93 - 1.25) | 0.328 |
| Vitamin D | 3384 | 0.77 (0.67 - 0.88) | **<0.001** | 1.05 (0.89 - 1.23) | 0.580 | 1.08 (0.93 - 1.25) | 0.308 |
| Vitamin E | 2786 | 0.80 (0.69 - 0.92) | **0.002** | 0.97 (0.81 - 1.15) | 0.725 | 1.06 (0.91 - 1.24) | 0.456 |
| Vitamin K | 1854 | 0.76 (0.65 - 0.90) | **0.001** | 0.93 (0.76 - 1.13) | 0.465 | 1.08 (0.91 - 1.29) | 0.387 |
| Biotin | 2441 | 0.77 (0.67 - 0.90) | **0.001** | 1.03 (0.86 - 1.23) | 0.786 | 1.09 (0.93 - 1.28) | 0.298 |
| Choline Bitartrate | 86 | 0.80 (0.44 - 1.39) | 0.445 | 0.87 (0.40 - 1.71) | 0.715 | 1.21 (0.64 - 2.18) | 0.533 |
| Phosphatidylcholine | 10 | - | - | - | - | - | - |
| Inositol Hexaniacinate | 3 | - | - | - | - | - | - |
| L-Methylfolate Calcium | 3 | - | - | - | - | - | - |

a Participants took any dietary supplement containing the specified vitamins.

Model was adjusted for age, sex, race, BMI group, poverty income ratio, education, smoking status, drinking status, marital status, physical activity, calorie intake, CVD history, stroke history, and diabetes status and with or without depressive symptoms (yes/no). Bold p-values denote statistical significance at the p < 0.05 level.

Abbreviation: SD, Standard deviation; MVM, multivitamin mineral supplements.

**Table S6.** Multivariate Cox regression analysis examining the impact of dietary supplements on all-cause mortality in participants who took any dietary supplement containing the specified vitamins.

| **Vitamins**a | **Crude Model** | | **Model 1** | | **Model 2** | |
| --- | --- | --- | --- | --- | --- | --- |
| **HR (95% CI)** | ***P*-value** | **HR (95% CI)** | ***P*-value** | **HR (95% CI)** | ***P*-value** |
| Vitamin A | 1.04 (0.89 - 1.21) | 0.635 | 0.80 (0.67 - 0.95) | **0.011** | 0.82 (0.69 - 0.97) | **0.024** |
| Thiamin | 1.05 (0.90 - 1.23) | 0.545 | 0.82 (0.69 - 0.97) | **0.023** | 0.85 (0.72 - 1.01) | 0.058 |
| Riboflavin | 1.05 (0.90 - 1.23) | 0.515 | 0.82 (0.69 - 0.97) | **0.023** | 0.85 (0.71 - 1.00) | 0.056 |
| Niacin | 1.05 (0.90 - 1.23) | 0.517 | 0.82 (0.69 - 0.97) | **0.018** | 0.84 (0.71 - 1.00) | **0.046** |
| Pantothenic Acid | 1.08 (0.92 - 1.26) | 0.356 | 0.83 (0.70 - 0.98) | **0.029** | 0.85 (0.72 - 1.01) | 0.065 |
| Vitamin B-6 | 1.02 (0.88 - 1.19) | 0.779 | 0.81 (0.68 - 0.95) | **0.012** | 0.83 (0.70 - 0.98) | **0.032** |
| Metafolin (L-Methylfolate) | - | - | - | - | - | - |
| Vitamin B-12 | 1.06 (0.91 - 1.23) | 0.489 | 0.82 (0.70 - 0.97) | **0.019** | 0.85 (0.72 - 1.00) | **0.046** |
| Choline | 0.43 (0.26 - 0.72) | **0.001** | 0.64 (0.38 - 1.07) | 0.088 | 0.68 (0.40 - 1.15) | 0.148 |
| Vitamin C | 1.08 (0.93 - 1.26) | 0.310 | 0.84 (0.71 - 0.99) | **0.033** | 0.86 (0.73 - 1.02) | 0.082 |
| Vitamin D | 1.07 (0.92 - 1.24) | 0.405 | 0.81 (0.69 - 0.95) | **0.009** | 0.83 (0.70 - 0.97) | **0.020** |
| Vitamin E | 1.03 (0.89 - 1.21) | 0.672 | 0.77 (0.65 - 0.92) | **0.003** | 0.80 (0.67 - 0.95) | **0.009** |
| Vitamin K | 1.12 (0.94 - 1.32) | 0.202 | 0.78 (0.65 - 0.94) | **0.009** | 0.80 (0.67 - 0.96) | **0.019** |
| Biotin | 1.06 (0.90 - 1.24) | 0.503 | 0.81 (0.68 - 0.97) | **0.021** | 0.83 (0.70 - 0.99) | **0.040** |
| Choline Bitartrate | 1.18 (0.65 - 2.16) | 0.587 | 1.06 (0.57 - 1.97) | 0.844 | 0.98 (0.53 - 1.83) | 0.958 |
| Phosphatidylcholine | - | - | - | - | - | - |
| Inositol Hexaniacinate | - | - | - | - | - | - |
| L-Methylfolate Calcium | - | - | - | - | - | - |

a Participants took any dietary supplement containing the specified vitamins.

Cox proportional hazard models were performed for all-cause mortality. The crude model did not adjust for any covariates. Model 1 was adjusted for age, sex, race, BMI group, poverty income ratio, education, smoking status, drinking status, marital status, physical activity, and depressive symptoms. Model 2 was adjusted for calorie intake, CVD history, stroke history, and diabetes status in addition to model 1. Bold p-values denote statistical significance at the p < 0.05 level.

Abbreviation: HR, hazard ratio; CI, confidence interval.

**Table S7.** Multivariate Cox regression analysis examining the impact of dietary supplements on cardiovascular mortality in participants who took any dietary supplement containing the specified vitamins.

| **Vitamins**a | **Crude Model** | | **Model 1** | | **Model 2** | |
| --- | --- | --- | --- | --- | --- | --- |
| **HR (95% CI)** | ***P*-value** | **HR (95% CI)** | ***P*-value** | **HR (95% CI)** | ***P*-value** |
| Vitamin A | 0.81 (0.54 - 1.22) | 0.309 | 0.57 (0.36 - 0.89) | **0.014** | 0.57 (0.37 - 0.90) | **0.015** |
| Thiamin | 0.87 (0.58 - 1.29) | 0.483 | 0.62 (0.40 - 0.96) | **0.033** | 0.64 (0.41 - 0.99) | **0.043** |
| Riboflavin | 0.88 (0.59 - 1.32) | 0.542 | 0.63 (0.41 - 0.97) | **0.037** | 0.64 (0.41 - 0.99) | **0.045** |
| Niacin | 0.88 (0.59 - 1.31) | 0.525 | 0.62 (0.40 - 0.95) | **0.030** | 0.63 (0.41 - 0.98) | **0.038** |
| Pantothenic Acid | 0.90 (0.60 - 1.34) | 0.602 | 0.61 (0.40 - 0.95) | **0.030** | 0.62 (0.40 - 0.97) | **0.035** |
| Vitamin B-6 | 0.85 (0.57 - 1.26) | 0.417 | 0.60 (0.39 - 0.93) | **0.021** | 0.61 (0.40 - 0.94) | **0.026** |
| Metafolin (L-Methylfolate) | - | - | - | - | - | - |
| Vitamin B-12 | 0.85 (0.57 - 1.25) | 0.408 | 0.59 (0.39 - 0.91) | **0.016** | 0.60 (0.39 - 0.92) | **0.018** |
| Choline | 0.17 (0.02 - 1.20) | 0.075 | 0.20 (0.03 - 1.52) | 0.121 | 0.22 (0.03 - 1.67) | 0.144 |
| Vitamin C | 0.91 (0.62 - 1.34) | 0.640 | 0.65 (0.43 - 0.99) | **0.043** | 0.66 (0.44 - 1.00) | 0.052 |
| Vitamin D | 0.94 (0.64 - 1.36) | 0.736 | 0.66 (0.44 - 0.98) | **0.042** | 0.68 (0.45 - 1.02) | 0.062 |
| Vitamin E | 0.91 (0.62 - 1.34) | 0.629 | 0.62 (0.41 - 0.95) | **0.028** | 0.63 (0.41 - 0.97) | **0.035** |
| Vitamin K | 0.94 (0.61 - 1.44) | 0.770 | 0.60 (0.37 - 0.97) | **0.036** | 0.62 (0.38 - 0.99) | **0.046** |
| Biotin | 0.83 (0.55 - 1.26) | 0.380 | 0.57 (0.36 - 0.90) | **0.015** | 0.57 (0.36 - 0.90) | **0.017** |
| Choline Bitartrate | 0.65 (0.09 - 4.69) | 0.668 | 0.67 (0.09 - 5.05) | 0.698 | 0.41 (0.05 - 3.57) | 0.416 |
| Phosphatidylcholine | - | - | - | - | - | - |
| Inositol Hexaniacinate | - | - | - | - | - | - |
| L-Methylfolate Calcium | - | - | - | - | - | - |

a Participants took any dietary supplement containing the specified vitamins.

Cox proportional hazard models were performed for cardiovascular mortality. The crude model did not adjust for any covariates. Model 1 was adjusted for age, sex, race, BMI group, poverty income ratio, education, smoking status, drinking status, marital status, physical activity, and depressive symptoms. Model 2 was adjusted for calorie intake, CVD history, stroke history, and diabetes status in addition to model 1. Bold p-values denote statistical significance at the p < 0.05 level.

Abbreviation: HR, hazard ratio; CI, confidence interval.

**Table S8.** Logistic regression analyses of the associations between dietary supplements, sleep duration, and depressive symptoms in sensitivity analysis.

| **Group** | **Short sleep** | | **Long sleep** | | **Depressive symptoms** | |
| --- | --- | --- | --- | --- | --- | --- |
| **OR (95% CI)** | ***P-*value** | **OR (95% CI)** | ***P-*value** | **OR (95% CI)** | ***P-*value** |
| **Without dietary supplement** | 1[Ref.] | - | 1[Ref.] | - | 1[Ref.] | - |
| **Melatonin** | 0.58 (0.34 - 0.96) | **0.044** | 1.18 (0.72 - 1.85) | 0.488 | 1.19 (0.74 - 1.83) | 0.454 |
| **Multivitamin mineral supplements** | 0.87 (0.77 - 0.98) | **0.025** | 0.87 (0.75 - 1.01) | 0.064 | 0.98 (0.86 - 1.12) | 0.788 |

Model was adjusted for age, sex, race, BMI group, poverty income ratio, education, smoking status, drinking status, marital status, physical activity, calorie intake, CVD history, stroke history, and diabetes status and with or without depressive symptoms. Bold p-values denote statistical significance at the p < 0.05 level. Abbreviation: OR, odds ratio; CI, confidence interval; BMI: Body mass index; CVD, cardiovascular disease.

**Table S9.** Multivariate Cox regression analysis examining the impact of dietary supplements in sensitivity analysis.

| **Group** | **Number of deaths** | **Crude Model** | | **Model 1** | | **Model 2** | |
| --- | --- | --- | --- | --- | --- | --- | --- |
| **HR (95% CI)** | ***P*-value** | **HR (95% CI)** | ***P*-value** | **HR (95% CI)** | ***P*-value** |
| **All-cause mortality** | | | | | | | |
| **Without dietary supplement** | 313 | 1[Ref.] | - | 1[Ref.] | - | 1[Ref.] | - |
| **Melatonin** | 17 | 1.68 (1.04 - 2.72) | **0.034** | 1.58 (0.98 - 2.56) | 0.063 | 1.62 (1.00 - 2.62) | 0.051 |
| **Multivitamin mineral supplements** | 327 | 0.91 (0.80 - 1.04) | 0.186 | 0.83 (0.72 - 0.95) | **0.009** | 0.86 (0.75 - 0.99) | **0.031** |
| **Cardiovascular mortality** | | | | | | | |
| **Without dietary supplement** | 52 | 1[Ref.] | - | 1[Ref.] | - | 1[Ref.] | - |
| **Melatonin** | 5 | 3.40 (1.39 - 8.33) | **0.007** | 3.60 (1.45 - 8.91) | **0.006** | 3.82 (1.54 - 9.46) | **0.004** |
| **Multivitamin mineral supplements** | 45 | 0.80 (0.56 - 1.14) | 0.218 | 0.74 (0.51 - 1.06) | 0.102 | 0.77 (0.53 - 1.11) | 0.167 |

Cox proportional hazard models were performed for all-cause mortality. Competing risk analyses of cause-specific mortality were performed. The crude model did not adjust for any covariates. Model 1 was adjusted for age, sex, race, BMI group, poverty income ratio, education, smoking status, drinking status, marital status, physical activity, and depressive symptoms. Model 2 was adjusted for calorie intake, CVD history, stroke history, and diabetes status in addition to Model 1. Bold p-values denote statistical significance at the p < 0.05 level.

Abbreviation: HR, Hazard Ratio; CI, confidence interval; BMI: Body mass index; CVD, cardiovascular disease.
